# Supplementary material for: The correlation between CRB1 variants and the clinical severity of Brazilian patients with different inherited retinal dystrophy phenotypes
Source: PubMed Central journal article supplement (PMC5561187; doi:10.1038/s41598-017-09035-1), 2017-08-17
Supplement: 41598_2017_9035_MOESM1_ESM.pdf [file 41598_2017_9035_MOESM1_ESM.pdf]

## Supplementary Information

**Title: The correlation between *CRBI* variants and the clinical severity of Brazilian patients with different inherited retinal dystrophy phenotypes**

Fabiana Louise Motta<sup>1</sup>, Mariana Vallim Salles<sup>1</sup>, Karita Antunes Costa<sup>1</sup>, Rafael Filippelli-Silva<sup>2</sup>, Renan Paulo Martin<sup>2</sup>, Juliana Maria Ferraz Sallum<sup>1\*</sup>

<sup>1</sup> Department of Ophthalmology, Federal University of Sao Paulo, Sao Paulo, Brazil

<sup>2</sup> Department of Biophysics, Federal University of Sao Paulo, Sao Paulo, Brazil

\*Corresponding Author: Juliana Maria Ferraz Sallum

Rua Botucatu 822; CEP 04023-062 São Paulo, Brazil

Telephone/Fax: +55 11 38422776

Email: juliana@pobox.com

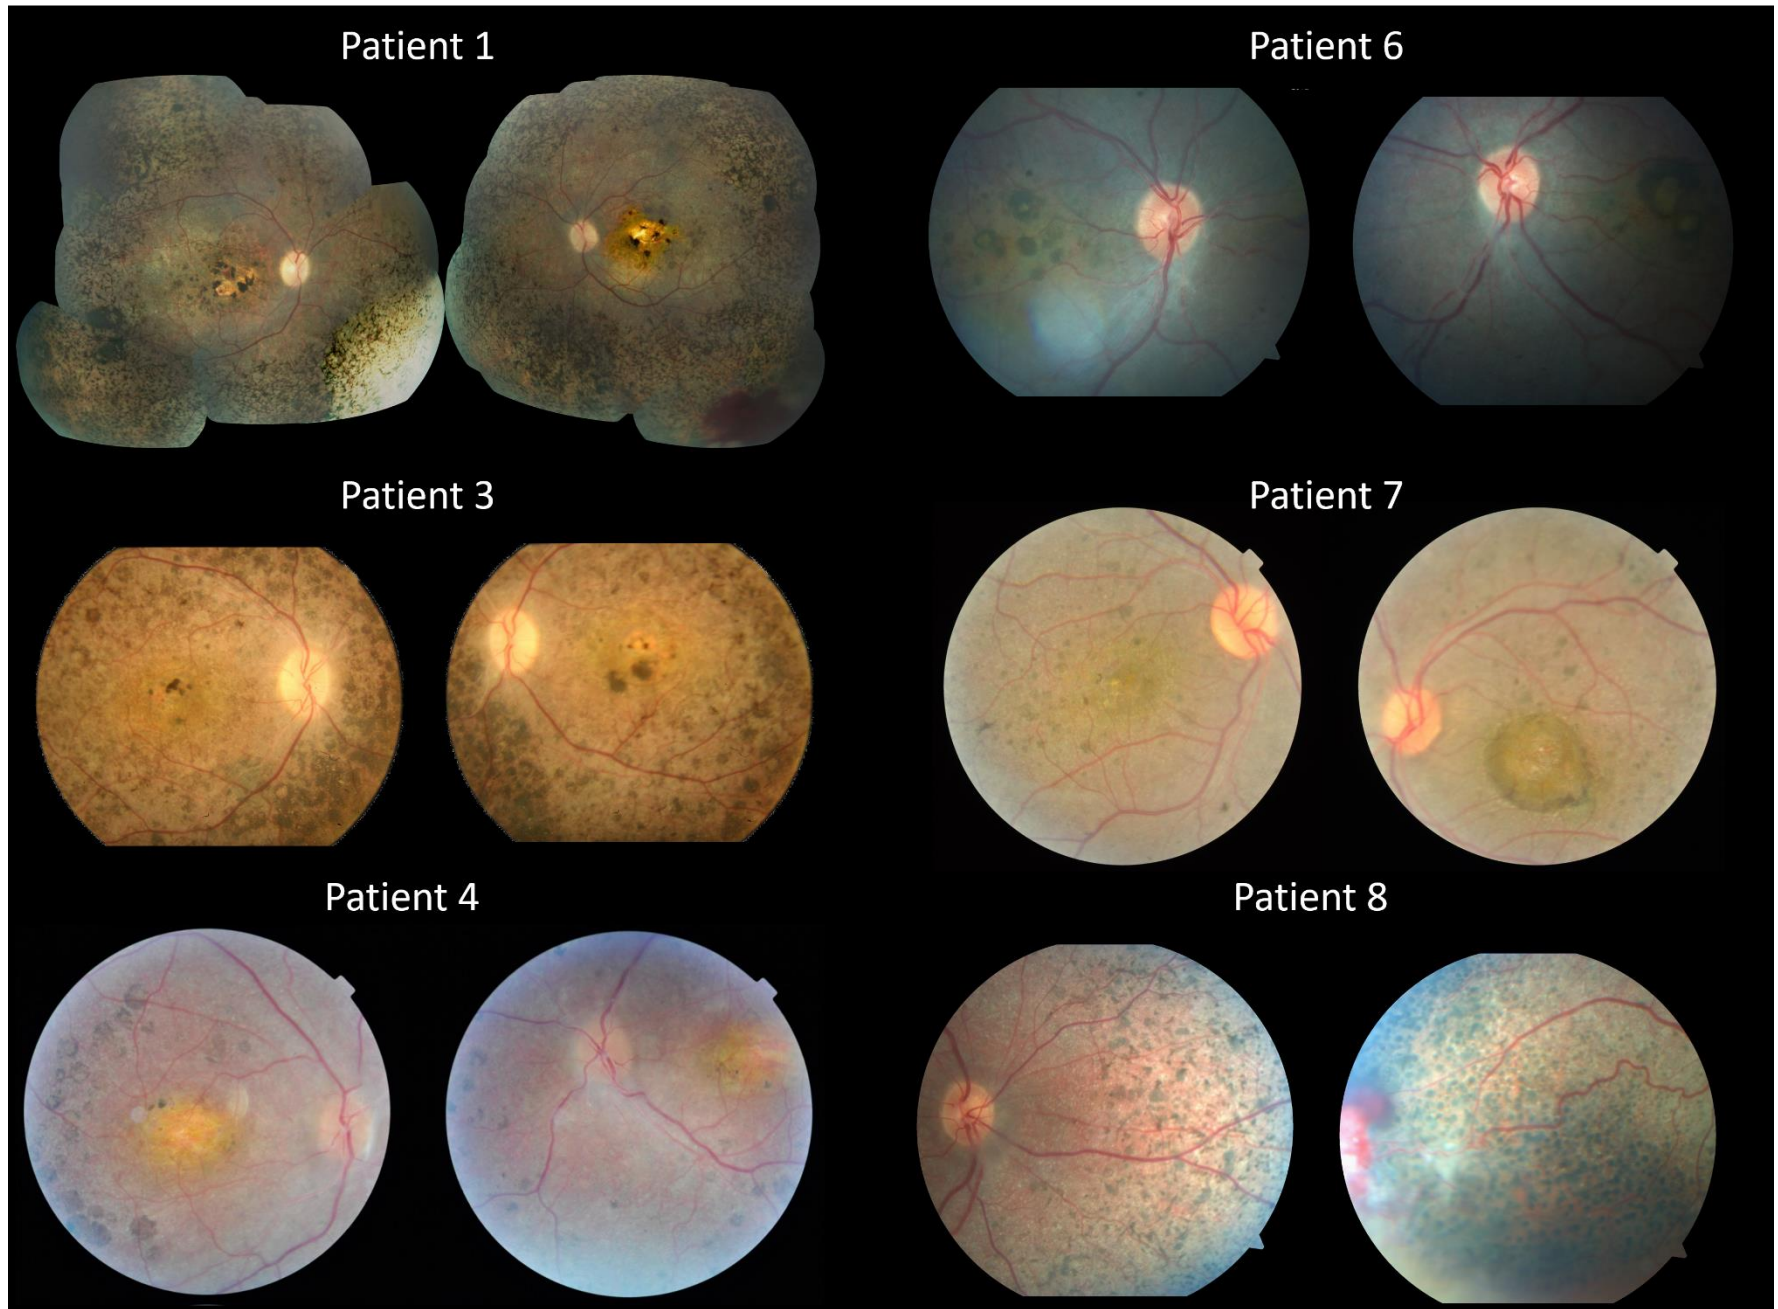

**Supplementary Figure S1. Fundus appearance of LCA patients.**

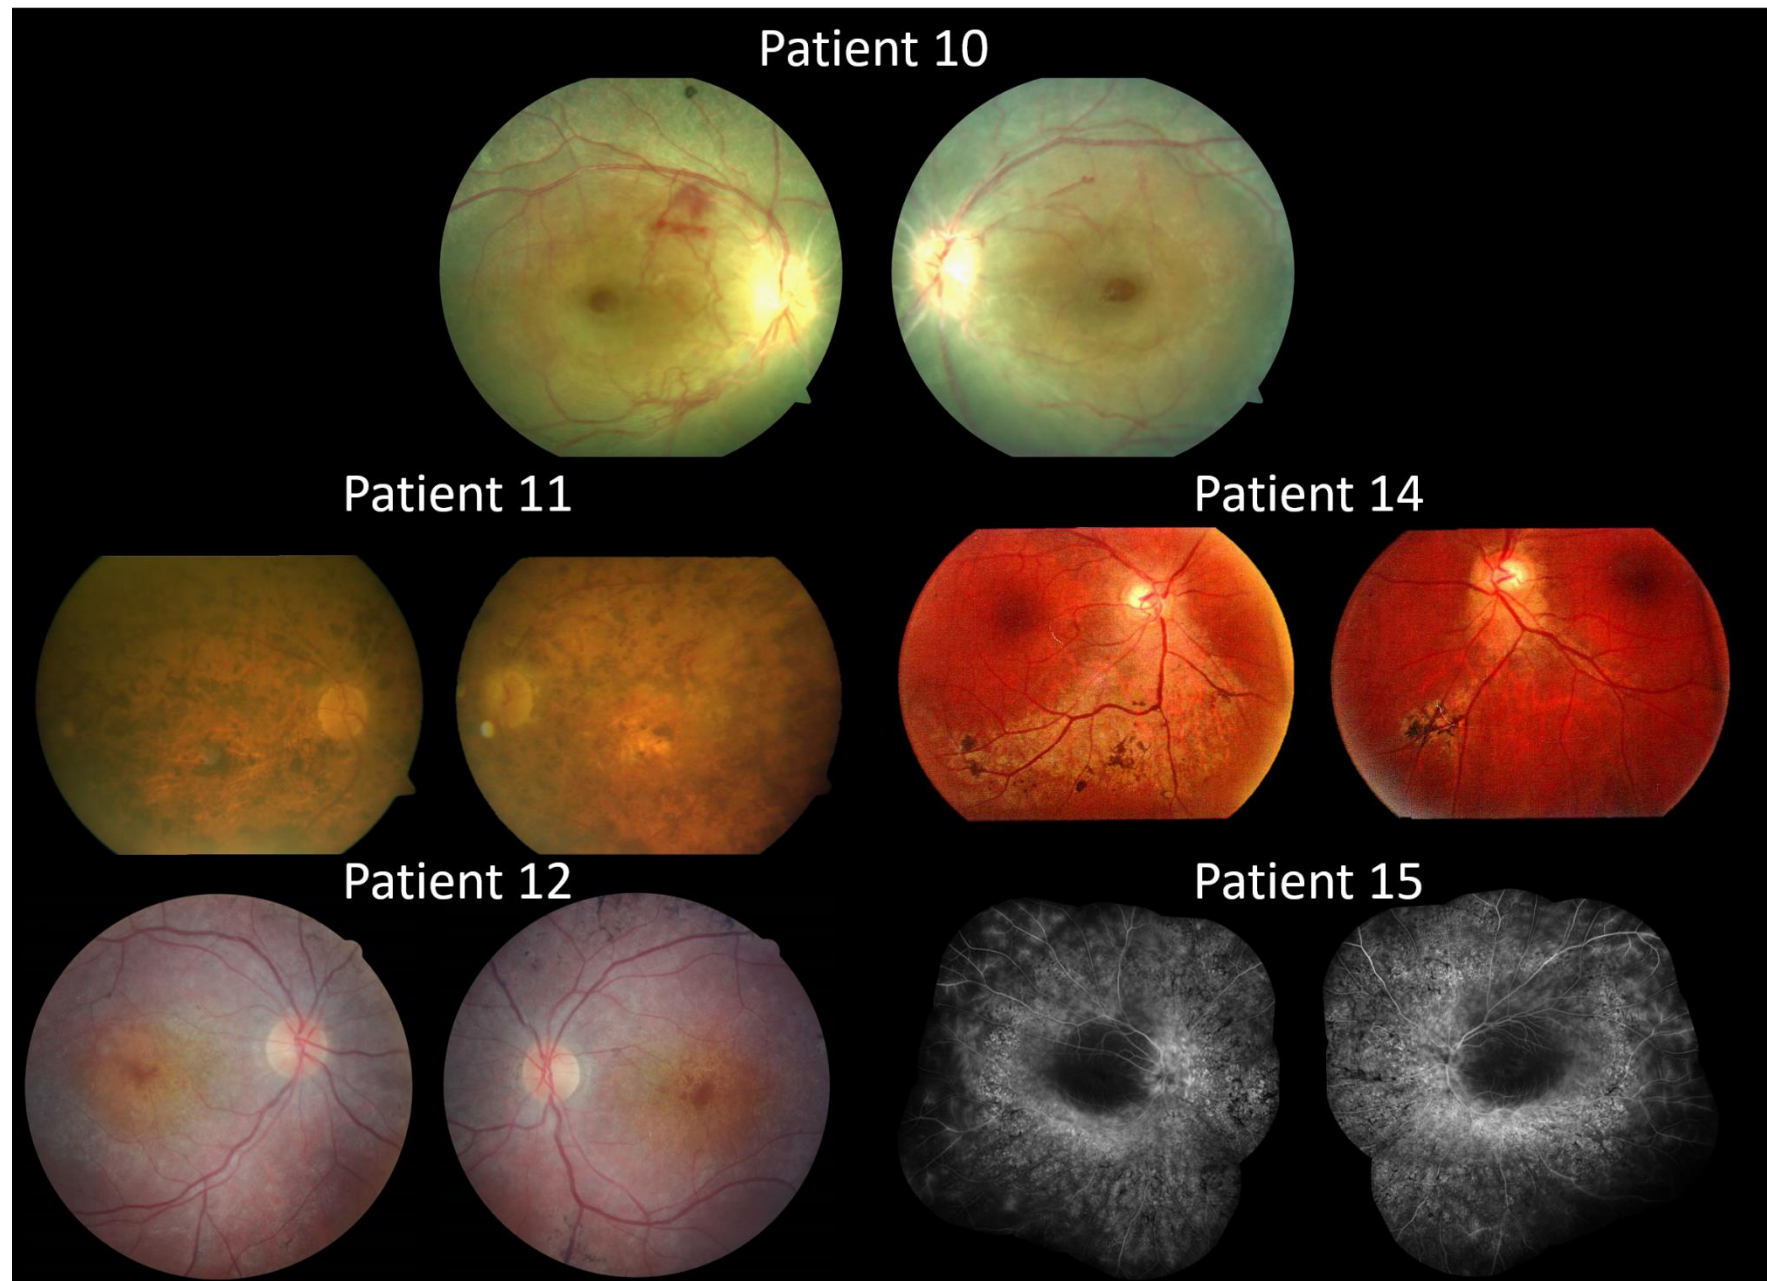

**Supplementary Figure S2. Fundus appearance of EORD (10), CRD (11 and 12) and RP (14 and 15) patients.**

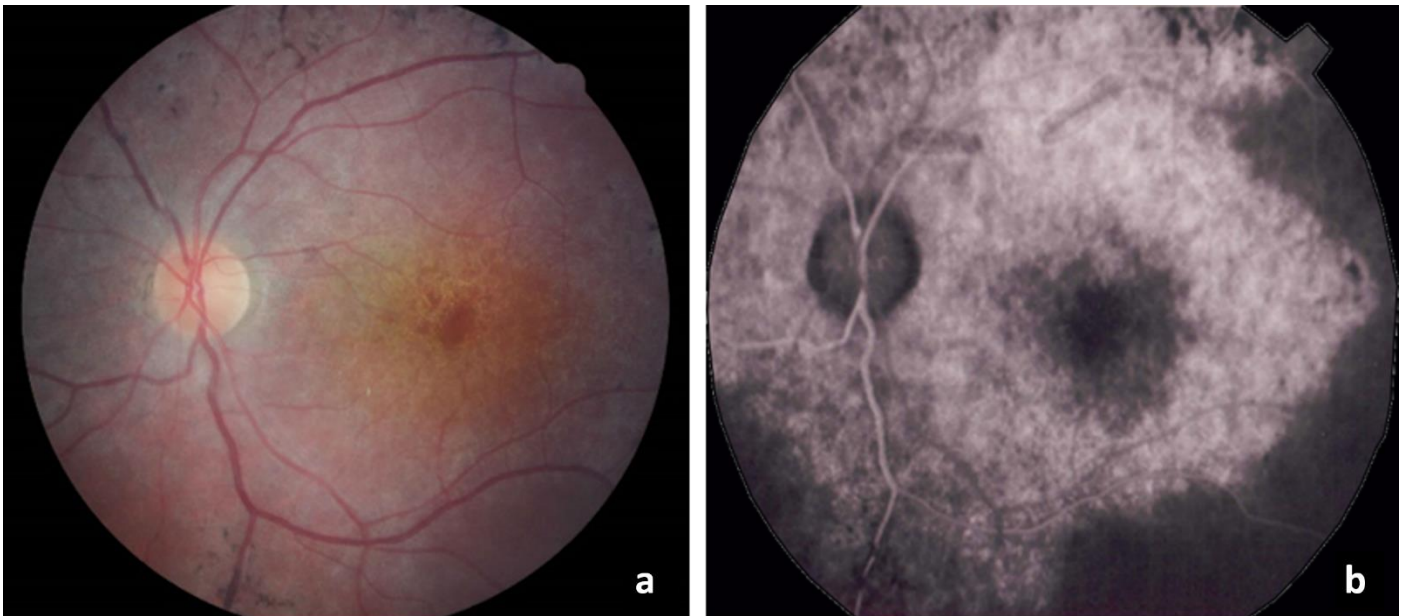

**Supplementary Figure S3. Fundus appearance of patient 12. (A) Color fundus photograph showing macular atrophy. (B) Fluorescein angiography showing hyperfluorescence of posterior pole and alteration of RPE pigmentation.**

PolymiRTS Database 3.0 - <http://compbio.uthsc.edu/miRSNP> (Bhattacharya et al. 2014)

RefSeq ID: [NM\\_001193640](#)  
 Gene Symbol: CRB1  
 Description: Homo sapiens crumbs homolog 1 (Drosophila) (CRB1), transcript variant 2, mRNA.  
 Gene Location: chr1(+):197237333-197447585

SNPs and INDELs in miRNA target sites

| Location  | dbSNP ID                    | Variant type | Wobble base pair | Ancestral Allele | Allele | miR ID                          | Conservation | miRSite       | Function Class | Exp Support | context+ score change |
|-----------|-----------------------------|--------------|------------------|------------------|--------|---------------------------------|--------------|---------------|----------------|-------------|-----------------------|
| 197447021 | <a href="#">rs199582748</a> | SNP          | N                | C                | C      | <a href="#">hsa-miR-4475</a>    | 3            | ttgtGCCCTTcg  | D              | N           | No Change             |
|           |                             |              |                  |                  | C      | <a href="#">hsa-miR-7515</a>    | 3            | ttgtGCCCTTcg  | D              | N           | No Change             |
|           |                             |              |                  |                  | T      | <a href="#">hsa-miR-7845-5p</a> | 4            | ttgtGCCCTTcg  | D              | N           | No Change             |
|           |                             |              |                  |                  | T      | <a href="#">hsa-miR-1252-5p</a> | 3            | ttgtGCCCTTcg  | C              | N           | No Change             |
| 197447037 | <a href="#">rs41302107</a>  | SNP          | N                | T                | T      | <a href="#">hsa-miR-3691-5p</a> | 5            | tggggATCCACAc | D              | N           | -0.112                |
|           |                             |              |                  |                  | T      | <a href="#">hsa-miR-376b-5p</a> | 5            | tggggATCCACAc | D              | N           | -0.123                |
|           |                             |              |                  |                  | T      | <a href="#">hsa-miR-376c-5p</a> | 5            | tggggATCCACAc | D              | N           | -0.123                |
|           |                             |              |                  |                  | T      | <a href="#">hsa-miR-3911</a>    | 5            | tggggATCCACAc | D              | N           | -0.234                |
|           |                             |              |                  |                  | T      | <a href="#">hsa-miR-4752</a>    | 5            | tggggATCCACAc | D              | N           | -0.109                |
|           |                             |              |                  |                  | T      | <a href="#">hsa-miR-8056</a>    | 5            | tggggATCCACAc | D              | N           | -0.111                |
|           |                             |              |                  |                  | C      | <a href="#">hsa-miR-6748-5p</a> | 5            | tggggACCCACAc | C              | N           | -0.134                |
|           |                             |              |                  |                  | C      | <a href="#">hsa-miR-6759-5p</a> | 5            | tggggACCCACAc | C              | N           | -0.167                |
|           |                             |              |                  |                  | C      | <a href="#">hsa-miR-6793-5p</a> | 5            | tggggACCCACAc | C              | N           | -0.144                |

Function Class: **D**: The derived allele disrupts a conserved miRNA site (ancestral allele with support >= 2).  
**C**: The derived allele creates a new miRNA site.

TargetScan (v7.0) - [www.targetscan.org](http://www.targetscan.org) (Agarwal et al. 2015)

**Poorly conserved**

|                               | Predicted consequential pairing of target region (top) and miRNA (bottom) | Site type     | Context++ score | Context++ score percentile | Weighted context++ score | Conserved branch length | PCT |
|-------------------------------|---------------------------------------------------------------------------|---------------|-----------------|----------------------------|--------------------------|-------------------------|-----|
| Position 18-29 of CRB1 3' UTR | 5' ...UCCUUCGAGAUAGGGG-4UCCAC...<br>3' GACUUUCUCUACCCCUACUCG              | non-canonical | N/A             | N/A                        | 0.00                     | 0                       | N/A |
| Position 18-29 of CRB1 3' UTR | 5' ...UCCUUCGAGAUAGGGG-4UCCAC...<br>3' GACUUUCUCUACCCCUACUCG              | non-canonical | N/A             | N/A                        | 0.00                     | 0                       | N/A |
| Position 27-33 of CRB1 3' UTR | 5' ...CCCUUCGAGAUAGGGG-4UCCAC...<br>3' UUGUAUCUCCUUAUAGGUGC               | 7mer-A1       | -0.16           | 76                         | -0.16                    | 0.031                   | N/A |
| Position 27-33 of CRB1 3' UTR | 5' ...CCCUUCGAGAUAGGGG-4UCCAC...<br>3' UUGUAUCUCCUUAUAGGUGC               | 7mer-A1       | -0.11           | 76                         | -0.11                    | 0.031                   | N/A |
| Position 27-33 of CRB1 3' UTR | 5' ...CCCUUCGAGAUAGGGG-4UCCAC...<br>3' CAUGGCUCAGAGGUAGUAGGUGA            | 7mer-A1       | -0.16           | 75                         | -0.16                    | 0                       | N/A |
| Position 27-33 of CRB1 3' UTR | 5' ...CCCUUCGAGAUAGGGG-4UCCAC...<br>3' UACGUAGGUCUGUAGGUGC                | 7mer-A1       | -0.07           | 59                         | -0.07                    | 0                       | N/A |
| Position 27-33 of CRB1 3' UTR | 5' ...CCCUUCGAGAUAGGGG-4UCCAC...<br>3' UCGUGUAGGAACUCUAGGUGUU             | 7mer-m8       | -0.02           | 29                         | -0.02                    | 0                       | N/A |
| Position 28-35 of CRB1 3' UTR | 5' ...CCCUUCGAGAUAGGGG-4UCCAC...<br>3' ACGGAGGAGGUCCUAGGUGUGU             | 8mer          | -0.20           | 88                         | -0.20                    | 0                       | N/A |

**Supplementary Figure S4. Result of miRNA in silico analysis.**
